# Supplementary material for: Risk of Mental Illness in Offspring of Parents With Schizophrenia, Bipolar Disorder, and Major Depressive Disorder: A Meta-Analysis of Family High-Risk Studies
Source: Oxford University Press journal article supplement (doi:10.1093/schbul/sbt114), 2013-08-19
Supplement: sbt114_Supplementary_Data.zip [file sbt114_Supplementary_Data.zip]

Archive with 2 entries (2 files):
- Supplementary_table_S1.doc
- SUPPLEMENTARY_Figure_S1.pdf
