# Supplementary material for: Risk of Mental Illness in Offspring of Parents With Schizophrenia, Bipolar Disorder, and Major Depressive Disorder: A Meta-Analysis of Family High-Risk Studies
Source: Oxford University Press journal article supplement (doi:10.1093/schbul/sbt114), 2013-08-19
Supplement: sbt114_Supplementary_Data.zip [file sbt114_Supplementary_Data.zip › SUPPLEMENTARY_Figure_S1.pdf]

**Supplementary Figure S1. Funnel plots probing for small study bias.**

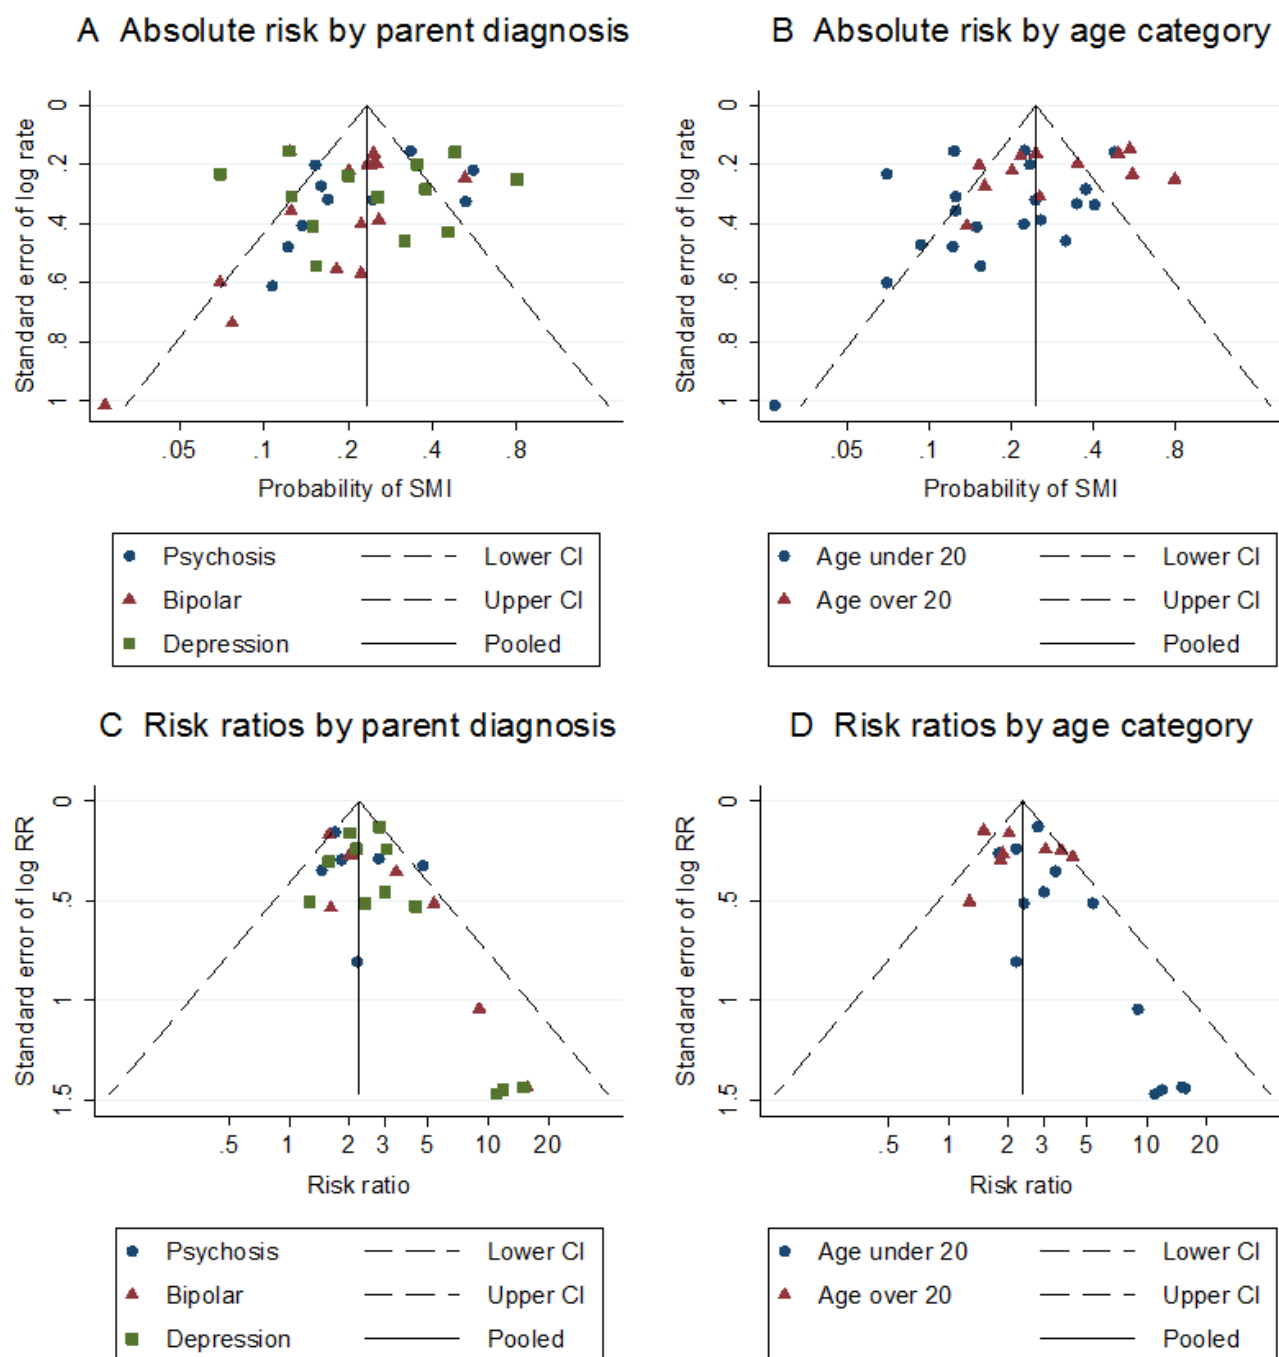

A: absolute risk of severe mental illness in offspring, marked by parent diagnosis; B: Absolute spring of severe mental illness in offspring, marked by mean offspring age; C Relative rates of severe mental illness in offspring of parents with severe mental illness versus control offspring, marked by parent diagnosis; D Relative rates of severe mental illness in offspring of parents with severe mental illness versus control offspring, marked by mean offspring age (under 20 years, 20 years and over).
